# Supplementary material for: MR protocol optimization for Hepatobiliary Phase Imaging with Gadoxetic Acid for 1.5T: Comparison Between Breath-Hold T1-weighted and High Resolution Navigated 3D T1-weighted sequences
Source: Preprints.org preprint supplement (doi:10.20944/preprints202406.1104.v1), 2024-06-17
Supplement: Supplementary file 1 [file supplementary]

Supplementary Table 1: Evaluation of Image Quality “Image Clearness”

|  | **Reader 1** | **Reader 2** | **Reader 3** |
| --- | --- | --- | --- |
| **BH 10°** | 4.22 ± 0.10 | 4.24 ± 0.10 | 4.20 ± 0.10 |
| **BH 30°** | 3.83 ± 0.10 | 3.79 ± 0.10 | 3.85 ± 0.10 |
| **BH 40°** | 3.09 ± 0.10 | 3.11 ± 0.10 | 3.06 ± 0.10 |
| **NAV 25°** | 4.24 ± 0.10 | 4.21 ± 0.10 | 4.26 ± 0.10 |
| **NAV 40°** | 4.62 ± 0.10 | 4.62 ± 0.10 | 4.64 ± 0.10 |

Results from each one of the three radiologists were tabulated reporting the mean value with standard deviation.

Supplementary Table 2: Evaluation of Image Quality “Artifacts”

|  | **Reader 1** | **Reader 2** | **Reader 3** |
| --- | --- | --- | --- |
| **BH 10°** | 3.70 ± 0.10 | 3.68 ± 0.10 | 3.72 ± 0.10 |
| **BH 30°** | 3.26 ± 0.10 | 3.28 ± 0.10 | 3.24 ± 0.10 |
| **BH 40°** | 2.77 ± 0.10 | 2.78 ± 0.10 | 2.75 ± 0.10 |
| **NAV 25°** | 3.37 ± 0.10 | 3.35 ± 0.10 | 3.39 ± 0.10 |
| **NAV 40°** | 3.76 ± 0.10 | 3.74 ± 0.10 | 3.78 ± 0.10 |

Results from each one of the three radiologists were tabulated reporting the mean value with standard deviation.

Supplementary Table 3: Evaluation of Image Quality “Diagnostic Reliability”

|  | **Reader 1** | **Reader 2** | **Reader 3** |
| --- | --- | --- | --- |
| **BH 10°** | 4.29 ± 0.10 | 4.27 ± 0.10 | 4.31 ± 0.10 |
| **BH 30°** | 4.03 ± 0.10 | 4.01 ± 0.10 | 4.05 ± 0.10 |
| **BH 40°** | 3.22 ± 0.10 | 3.20 ± 0.10 | 3.17 ± 0.10 |
| **NAV 25°** | 4.24 ± 0.10 | 4.25 ± 0.10 | 4.27 ± 0.10 |
| **NAV 40°** | 4.77 ± 0.10 | 4.75 ± 0.10 | 4.79 ± 0.10 |

Results from each one of the three radiologists were tabulated reporting the mean value with standard deviation.
